# Supplementary material for: Multiplex coherent anti-Stokes Raman scattering highlights state of chromatin condensation in CH region
Source: PubMed Central journal article supplement (PMC6761141; doi:10.1038/s41598-019-50453-0), 2019-09-25

# Supplementary Information

## Multiplex coherent anti-Stokes Raman scattering highlights state of chromatin condensation in CH region

Tiffany Guerenne-Del Ben<sup>1</sup>, Zakaniaina Rajaofara<sup>2</sup>, Vincent Couderc<sup>2</sup>, Vincent Sol<sup>1</sup>, Hideaki Kano<sup>3,4</sup>,  
Philippe Leproux<sup>2,5,\*</sup>, and Jean-Michel Petit<sup>1,\*</sup>

\* Correspondence to [philippe.leproux@unilim.fr](mailto:philippe.leproux@unilim.fr) and [jean-michel.petit@unilim.fr](mailto:jean-michel.petit@unilim.fr)

<sup>1</sup> PEIRENE, EA 7500, University of Limoges, 123 avenue Albert Thomas, 87060 Limoges, France

<sup>2</sup> XLIM, UMR 7252, University of Limoges, 123 avenue Albert Thomas, 87060 Limoges, France

<sup>3</sup> Department of Applied Physics, Graduate School of Pure and Applied Sciences, University of Tsukuba,  
1-1-1 Tennodai, Tsukuba, Ibaraki 305-8573, Japan

<sup>4</sup> Institute of Applied Physics, University of Tsukuba, 1-1-1 Tennodai, Tsukuba, Ibaraki 305-8573, Japan

<sup>5</sup> LEUKOS, 37 rue Henri Giffard, 87280 Limoges, France

**Supplementary Fig. 1** Analysis of interphase, stained and unstained, fixed HEK293 cells. Bright-field, fluorescence and MCARS ( $\text{CH}_2$ ,  $\text{CH}_3$ , merge) images of selected cells. MCARS images were reconstructed at  $2850\text{ cm}^{-1}$  ( $\text{CH}_2$  symmetric stretching) and  $2930\text{ cm}^{-1}$  ( $\text{CH}_3$  symmetric stretching). Scale bar,  $5\text{ }\mu\text{m}$ .

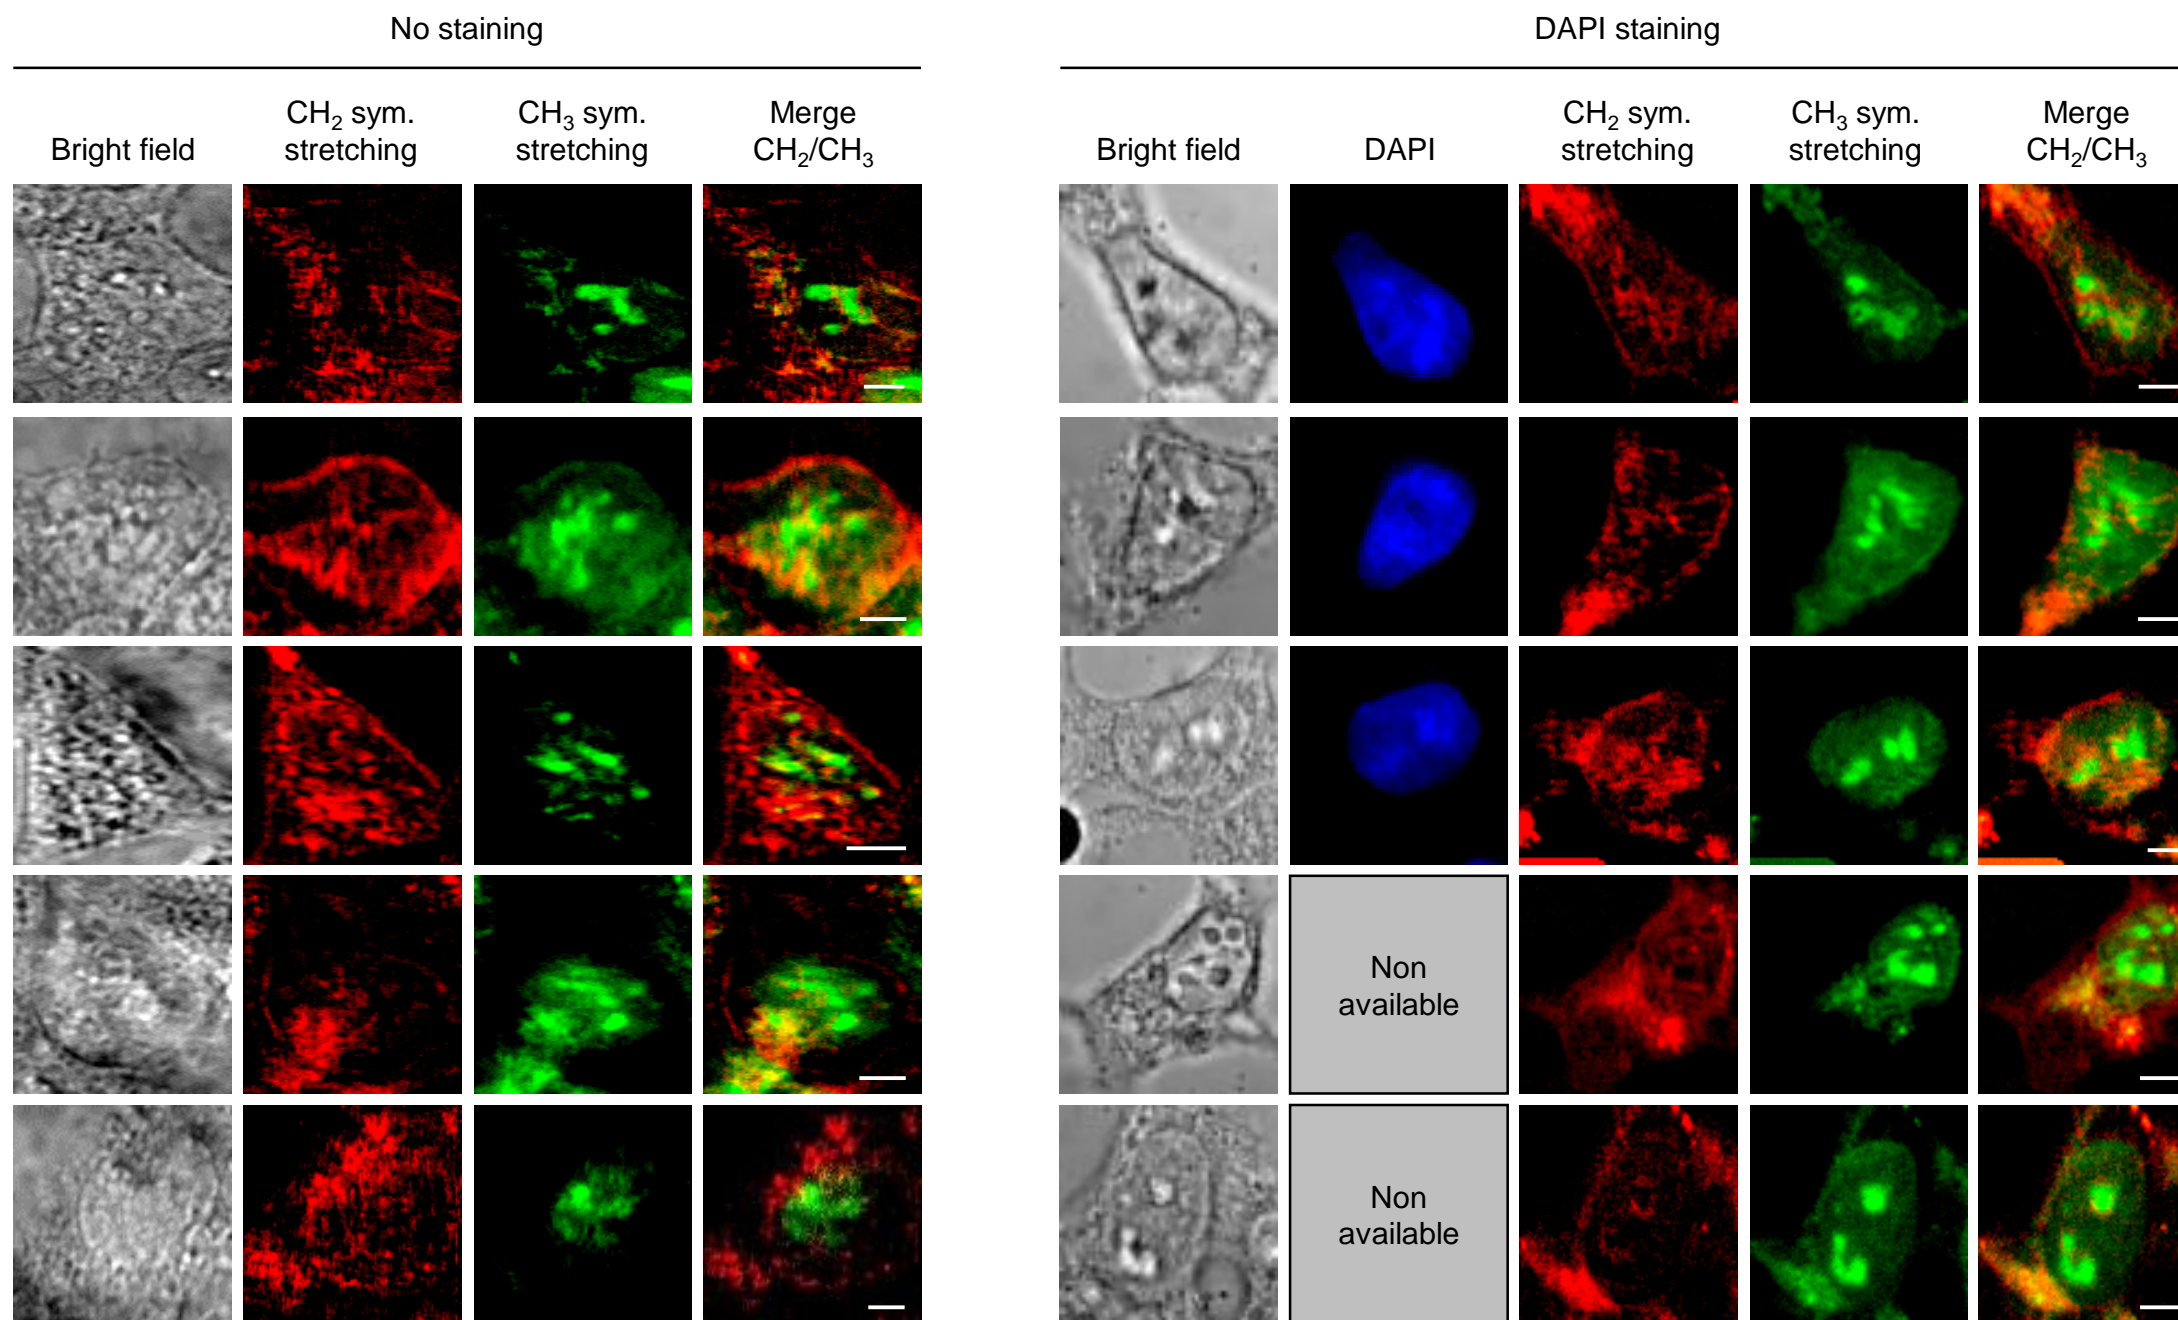

**Supplementary Fig. 2** Analysis of mitotic, stained and unstained, fixed HEK293 cells. Bright-field, fluorescence and MCARS ( $\text{CH}_2$ ,  $\text{CH}_3$ , merge) images of selected cells. MCARS images were reconstructed at  $2850\text{ cm}^{-1}$  ( $\text{CH}_2$  symmetric stretching) and  $2930\text{ cm}^{-1}$  ( $\text{CH}_3$  symmetric stretching). Scale bar,  $5\text{ }\mu\text{m}$ .

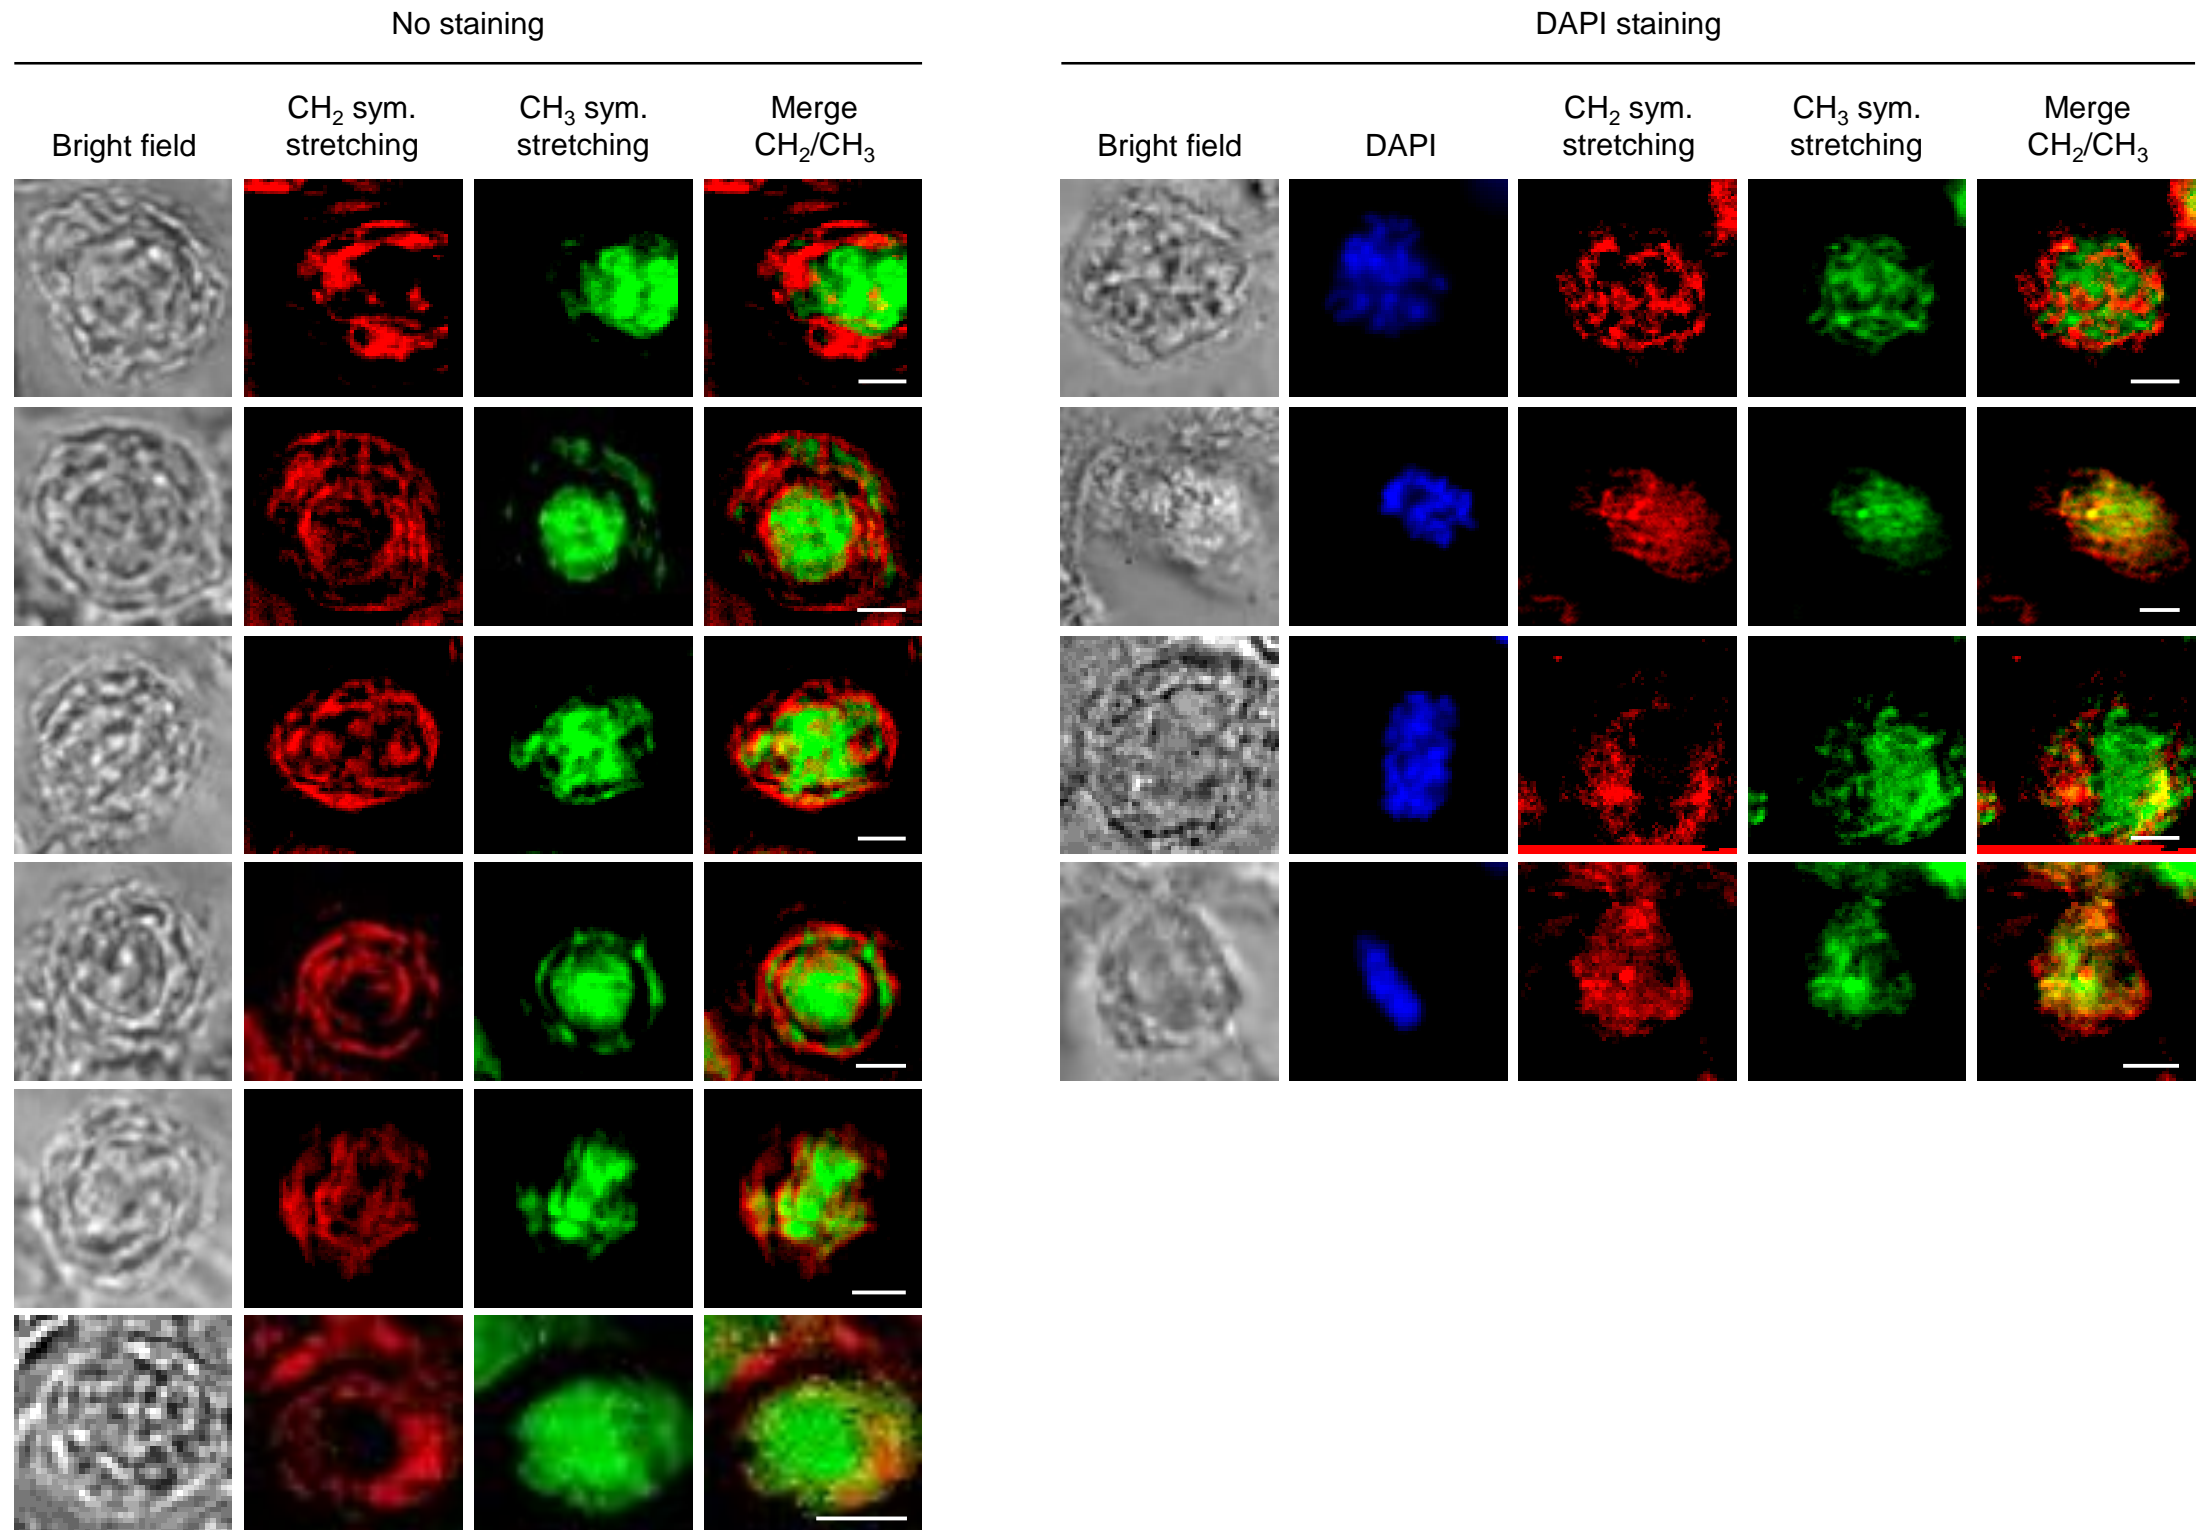

Supplement: 41598_2019_50453_MOESM1_ESM.pdf [file 41598_2019_50453_MOESM1_ESM.pdf]
